# Supplementary material for: T cell-intrinsic protein kinase D3 is dispensable for the cells’ activation
Source: Frontiers journal article supplement (doi:10.3389/fimmu.2022.1049033), 2022-11-17
Supplement: Data_Sheet_1.pdf [file Data_Sheet_1.pdf]

## Supplementary Material

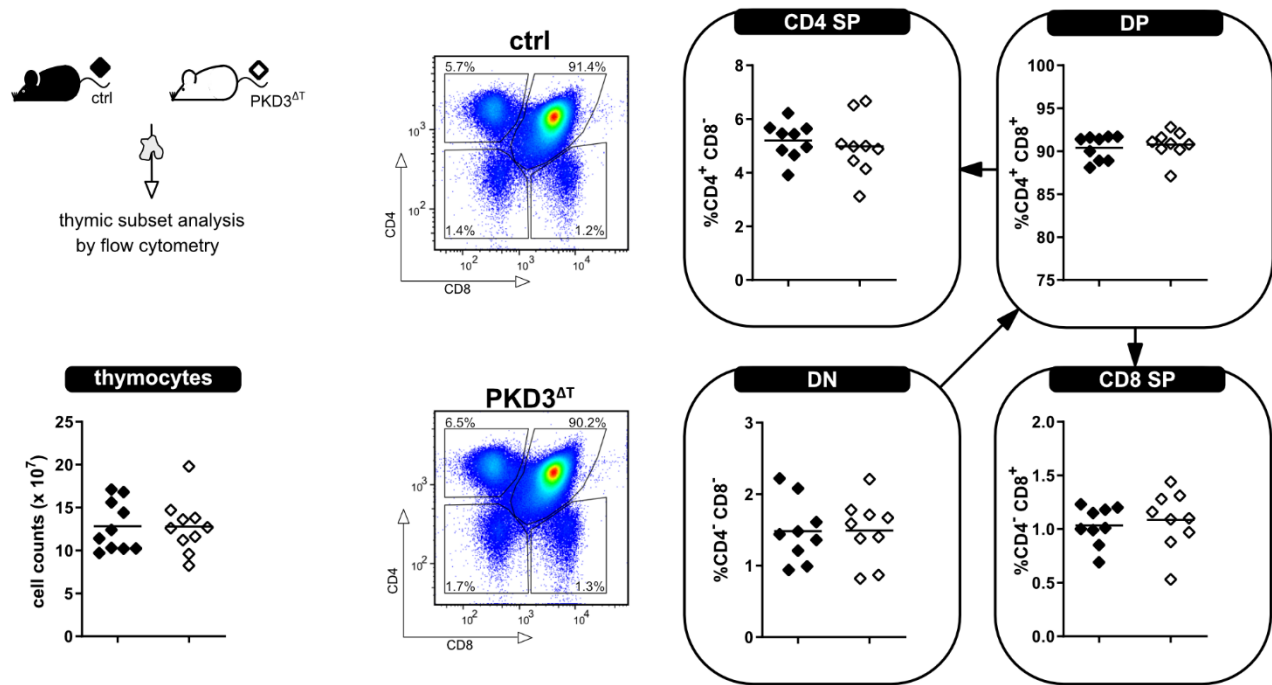

### Supplementary Figure 1. Unaltered thymic development of PKD3 $\Delta$ T mice

Thymocytes from either PKD3 $\Delta$ T mice (◇) and respective controls (◆) were counted and analyzed for CD4 and CD8 expression by flow cytometry. Results are shown with a representative dot plot together with summarizing graphs showing relative proportions of CD4/8 double negative (DN), double positive (DP) and CD4 as well as CD8 single positive (SP) cells. (n = 9; from 3 independent experiments)
